# Supplementary material for: Characterisation of biomarkers of intestinal barrier function in response to a high fat/high carbohydrate meal and corticotropin releasing hormone
Source: PLoS One. 2024 Feb 26;19(2):e0294918. doi: 10.1371/journal.pone.0294918 (PMC10896497; doi:10.1371/journal.pone.0294918)
Supplement: S2 Data — (XLSX) [file pone.0294918.s005.xlsx]

## Sheet: Sheet1
participant no	Sex	Age	BMI	side effect from CRH
1	0	30-40	22.2222	nil
2	1	20-30	20.6193	anxiety/flushing
3	0	30-40	25.1063	nil
4	0	30-40	26.5703	nil
5	1	30-40	21.4619	metallic taste
6	1	30-40	20.0418	flush, funny taste in mouth
7	1	60-70	24.8016	nil
8	0	60-70	26.5832	nil
9	0	30-40	21.6815	nil
10	1	30-40	22.9591	nil
